# Supplementary material for: Metformin anti-tumor effect via disruption of the MID1 translational regulator complex and AR downregulation in prostate cancer cells
Source: Springer Nature journal article supplement (doi:10.1186/1471-2407-14-52), 2014-01-31
Supplement: 12885_2013_4312_MOESM2_ESM.pdf [file 12885_2013_4312_MOESM2_ESM.pdf]

**A** Du145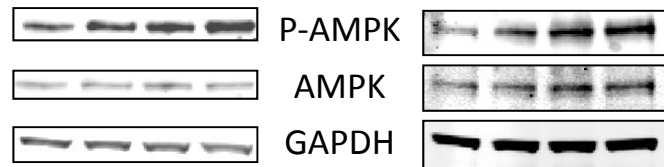

## PC3

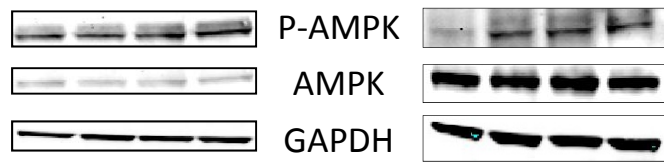Co 0.5 1 5  
mM Metformin 24hCo 0.5 1 5  
mM Metformin 96h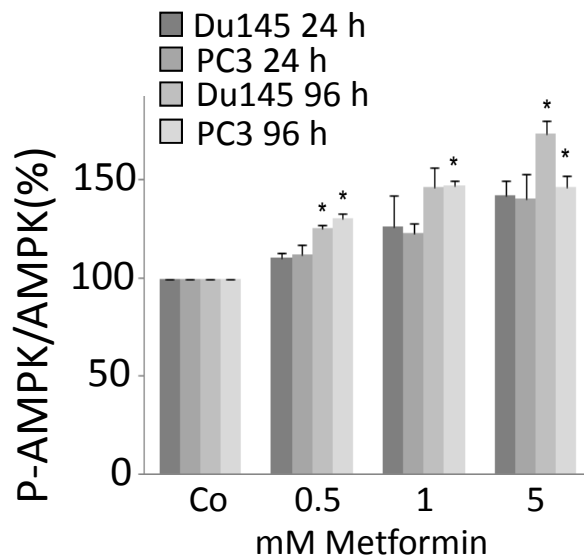**B** DuCaP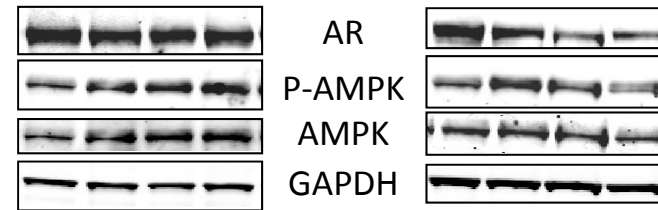

## LNCaP

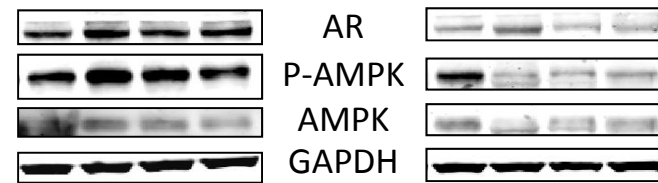Co 0.5 1 5  
mM Metformin 24hCo 0.5 1 5  
mM Metformin 96h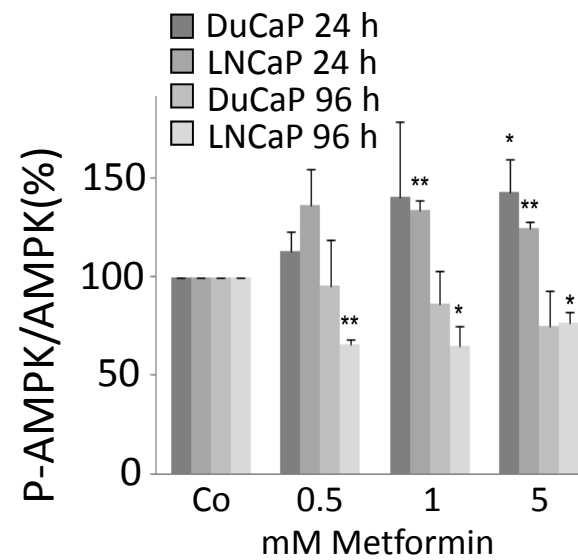

Supplementary Fig. S1
