# Supplementary material for: Metformin anti-tumor effect via disruption of the MID1 translational regulator complex and AR downregulation in prostate cancer cells
Source: Springer Nature journal article supplement (doi:10.1186/1471-2407-14-52), 2014-01-31
Supplement: 12885_2013_4312_MOESM4_ESM.pdf [file 12885_2013_4312_MOESM4_ESM.pdf]

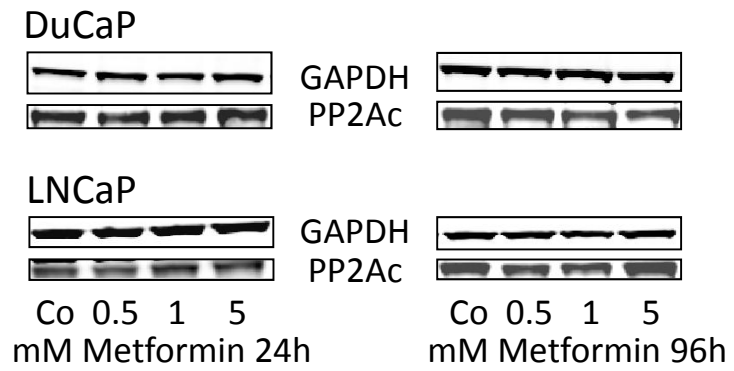

Supplementary Fig. S3
