# Supplementary figures and images for: Metformin anti-tumor effect via disruption of the MID1 translational regulator complex and AR downregulation in prostate cancer cells
Source: Springer Nature journal article supplement (doi:10.1186/1471-2407-14-52), 2014-01-31

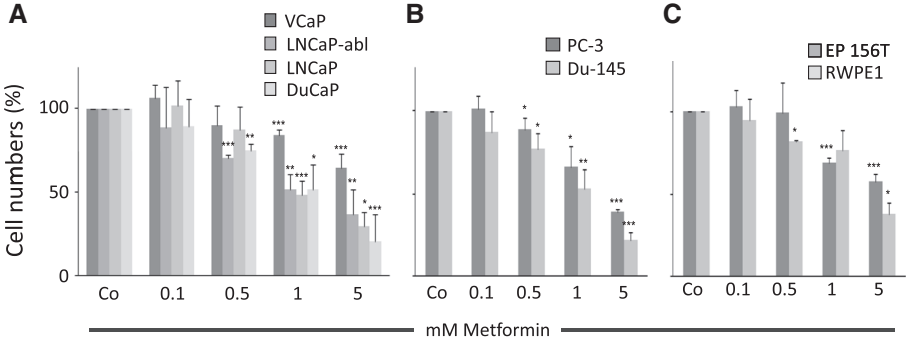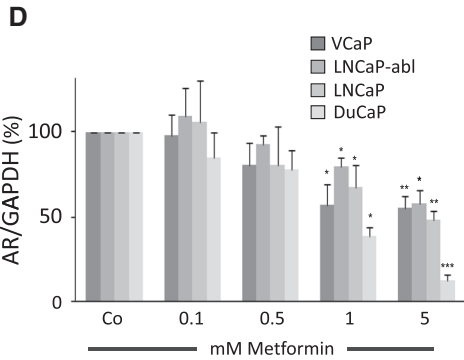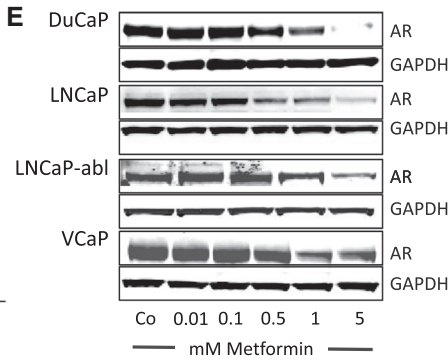

Supplement: 12885_2013_4312_MOESM5_ESM.pdf [file 12885_2013_4312_MOESM5_ESM.pdf]

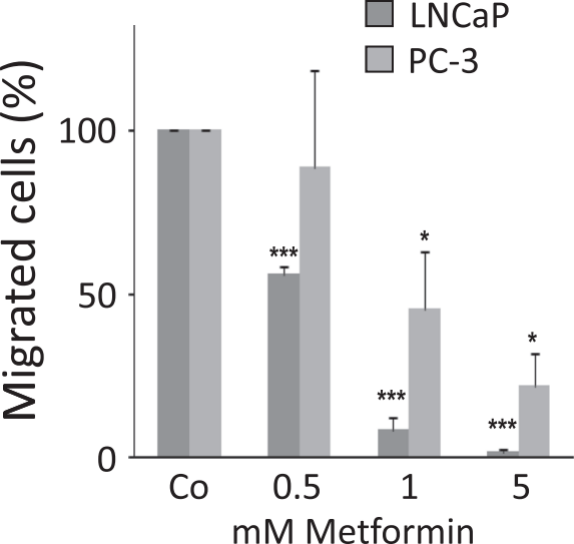

Supplement: 12885_2013_4312_MOESM6_ESM.pdf [file 12885_2013_4312_MOESM6_ESM.pdf]

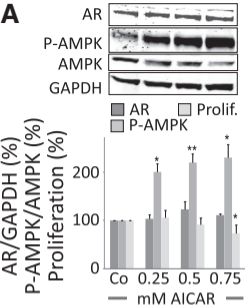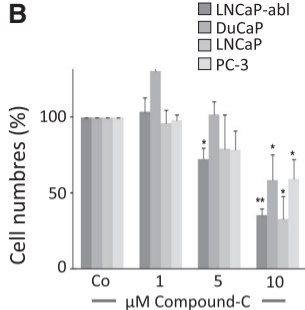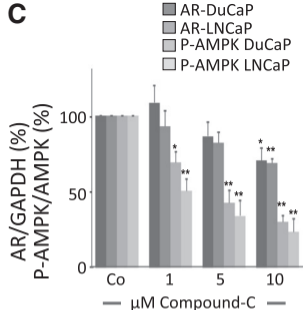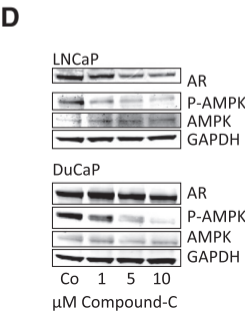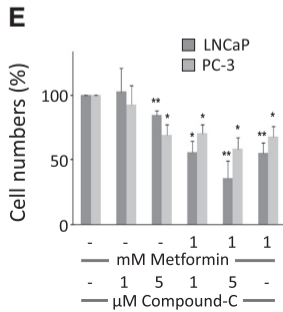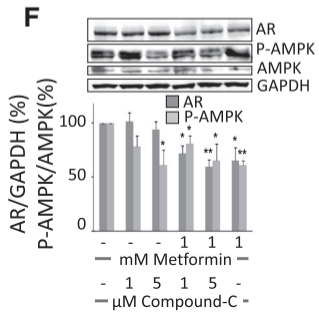

Supplement: 12885_2013_4312_MOESM7_ESM.pdf [file 12885_2013_4312_MOESM7_ESM.pdf]

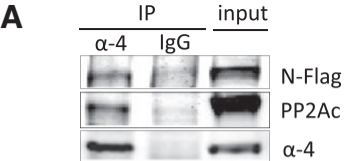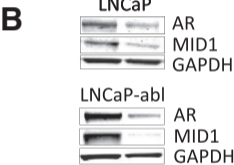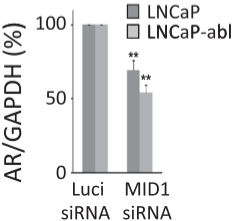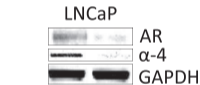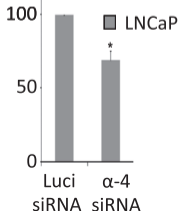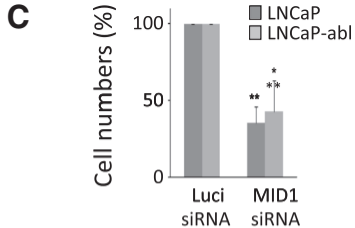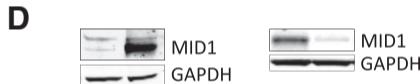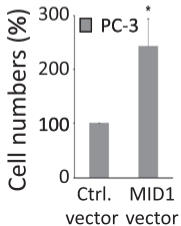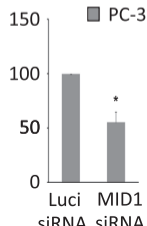

Supplement: 12885_2013_4312_MOESM8_ESM.pdf [file 12885_2013_4312_MOESM8_ESM.pdf]

**A**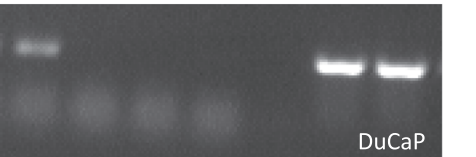

α4    IgG    α4    IgG    NeCo    Inpt    Inpt    IP  
 0       0       5       5       0       0       5

mM Metformin

**B**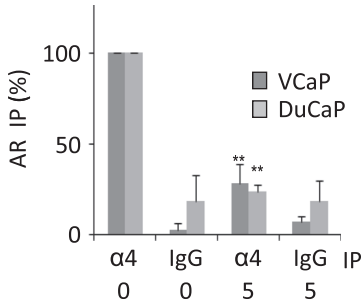

Supplement: 12885_2013_4312_MOESM9_ESM.pdf [file 12885_2013_4312_MOESM9_ESM.pdf]
